# Supplementary material for: Therapeutic adenine base editing of human hematopoietic stem cells
Source: PubMed Central journal article supplement (PMC9839747; doi:10.1038/s41467-022-35508-7), 2023-01-13
Supplement: 41467_2022_35508_MOESM3_ESM.pdf [file 41467_2022_35508_MOESM3_ESM.pdf]

## **Description of Additional Supplementary Files**

**Supplementary Data 1:** Single guide RNA sequences, PAM and related primers

**Supplementary Data 2:** Predicted off-target site information of sg1620 and related primers

**Supplementary Data 3:** Predicted off-target site information of sgHBGsense and related primers
