# Supplementary material for: Therapeutic adenine base editing of human hematopoietic stem cells
Source: PubMed Central journal article supplement (PMC9839747; doi:10.1038/s41467-022-35508-7), 2023-01-13
Supplement: 41467_2022_35508_MOESM7_ESM.pdf [file 41467_2022_35508_MOESM7_ESM.pdf]

## Reporting Summary

Nature Portfolio wishes to improve the reproducibility of the work that we publish. This form provides structure for consistency and transparency in reporting. For further information on Nature Portfolio policies, see our [Editorial Policies](#) and the [Editorial Policy Checklist](#).

### Statistics

For all statistical analyses, confirm that the following items are present in the figure legend, table legend, main text, or Methods section.

n/a Confirmed

- The exact sample size ( $n$ ) for each experimental group/condition, given as a discrete number and unit of measurement
- A statement on whether measurements were taken from distinct samples or whether the same sample was measured repeatedly
- The statistical test(s) used AND whether they are one- or two-sided  
*Only common tests should be described solely by name; describe more complex techniques in the Methods section.*
- A description of all covariates tested
- A description of any assumptions or corrections, such as tests of normality and adjustment for multiple comparisons
- A full description of the statistical parameters including central tendency (e.g. means) or other basic estimates (e.g. regression coefficient) AND variation (e.g. standard deviation) or associated estimates of uncertainty (e.g. confidence intervals)
- For null hypothesis testing, the test statistic (e.g.  $F$ ,  $t$ ,  $r$ ) with confidence intervals, effect sizes, degrees of freedom and  $P$  value noted  
*Give  $P$  values as exact values whenever suitable.*
- For Bayesian analysis, information on the choice of priors and Markov chain Monte Carlo settings
- For hierarchical and complex designs, identification of the appropriate level for tests and full reporting of outcomes
- Estimates of effect sizes (e.g. Cohen's  $d$ , Pearson's  $r$ ), indicating how they were calculated

*Our web collection on [statistics for biologists](#) contains articles on many of the points above.*

### Software and code

Policy information about [availability of computer code](#)

Data collection

Data analysis

For manuscripts utilizing custom algorithms or software that are central to the research but not yet described in published literature, software must be made available to editors and reviewers. We strongly encourage code deposition in a community repository (e.g. GitHub). See the Nature Portfolio [guidelines for submitting code & software](#) for further information.

### Data

Policy information about [availability of data](#)

All manuscripts must include a [data availability statement](#). This statement should provide the following information, where applicable:

- Accession codes, unique identifiers, or web links for publicly available datasets
- A description of any restrictions on data availability
- For clinical datasets or third party data, please ensure that the statement adheres to our [policy](#)

All amplicon deep-sequencing data and RNA sequencing data generated in this article can be found at the National Center for Biotechnology Information's Sequence Read Archive with accession code PRJNA892449[<https://www.ncbi.nlm.nih.gov/sra/PRJNA892449>]. All data supporting the findings of this study are available within the article and Supplementary Information files and also are available from the corresponding author upon reasonable request. Source data are provided with this paper.

## Field-specific reporting

Please select the one below that is the best fit for your research. If you are not sure, read the appropriate sections before making your selection.

Life sciences  Behavioural & social sciences  Ecological, evolutionary & environmental sciences

For a reference copy of the document with all sections, see [nature.com/documents/nr-reporting-summary-flat.pdf](https://www.nature.com/documents/nr-reporting-summary-flat.pdf)

## Life sciences study design

All studies must disclose on these points even when the disclosure is negative.

|                 |                                                                                                                                                                                                                                                                                                                                              |
|-----------------|----------------------------------------------------------------------------------------------------------------------------------------------------------------------------------------------------------------------------------------------------------------------------------------------------------------------------------------------|
| Sample size     | No sample size calculation was performed in this article. The sample sizes for all statistical comparisons were made using the community default criteria, i.e. biological replicates $\geq 3$ .                                                                                                                                             |
| Data exclusions | No data were excluded from the analyses.                                                                                                                                                                                                                                                                                                     |
| Replication     | Data obtained from edited input cells for transplantation experiments were successfully performed with more than three technical replicates. The cells were then divided equally and transplanted into multiple recipient mice. All the other experiments are replicated more than three times. All attempts at replication were successful. |
| Randomization   | Samples were allocated into experimental groups randomly.                                                                                                                                                                                                                                                                                    |
| Blinding        | The Investigators were not blinded to allocation during experiments and outcome assessment.                                                                                                                                                                                                                                                  |

## Reporting for specific materials, systems and methods

We require information from authors about some types of materials, experimental systems and methods used in many studies. Here, indicate whether each material, system or method listed is relevant to your study. If you are not sure if a list item applies to your research, read the appropriate section before selecting a response.

### Materials & experimental systems

| n/a                                 | Involved in the study                                           |
|-------------------------------------|-----------------------------------------------------------------|
| <input type="checkbox"/>            | <input checked="" type="checkbox"/> Antibodies                  |
| <input checked="" type="checkbox"/> | <input type="checkbox"/> Eukaryotic cell lines                  |
| <input checked="" type="checkbox"/> | <input type="checkbox"/> Palaeontology and archaeology          |
| <input type="checkbox"/>            | <input checked="" type="checkbox"/> Animals and other organisms |
| <input type="checkbox"/>            | <input checked="" type="checkbox"/> Human research participants |
| <input checked="" type="checkbox"/> | <input type="checkbox"/> Clinical data                          |
| <input checked="" type="checkbox"/> | <input type="checkbox"/> Dual use research of concern           |

### Methods

| n/a                                 | Involved in the study                              |
|-------------------------------------|----------------------------------------------------|
| <input checked="" type="checkbox"/> | <input type="checkbox"/> ChIP-seq                  |
| <input type="checkbox"/>            | <input checked="" type="checkbox"/> Flow cytometry |
| <input checked="" type="checkbox"/> | <input type="checkbox"/> MRI-based neuroimaging    |

## Antibodies

|                 |                                                                                                                                                                                                                                                                                                                                                                                                                                                                                                                                                                                                                                                                                                                                                                                                                                                                                                                                                                                                                                                                                                                                                                                                     |
|-----------------|-----------------------------------------------------------------------------------------------------------------------------------------------------------------------------------------------------------------------------------------------------------------------------------------------------------------------------------------------------------------------------------------------------------------------------------------------------------------------------------------------------------------------------------------------------------------------------------------------------------------------------------------------------------------------------------------------------------------------------------------------------------------------------------------------------------------------------------------------------------------------------------------------------------------------------------------------------------------------------------------------------------------------------------------------------------------------------------------------------------------------------------------------------------------------------------------------------|
| Antibodies used | Violet 421™ anti-human CD45 Antibody (304032, Biolegend), PE/Dazzle™ 594 anti-mouse CD45 Antibody (103146, Biolegend), PE anti-human CD235a (Glycophorin A) Antibody (349106, Biolegend), FITC anti-human CD33 Antibody (303304, BioLegend), APC anti-human CD19 Antibody (302212, BioLegend), Fixable Viability Dye eFluor 780 for live/dead staining (65-0865-14, Thermo Fisher).                                                                                                                                                                                                                                                                                                                                                                                                                                                                                                                                                                                                                                                                                                                                                                                                                 |
| Validation      | Each antibody for the species and application is validated. Validation statements are available on the manufacturer's website. Violet 421™ anti-human CD45 Antibody (304032, Biolegend), <a 793="" 839"="" 953="" 973="" data-label="Page-Footer" href="https://www.biolegend.com/it-it/products/brilliant-violet-421-anti-human-cd45-antibody-7332@PE/Dazzle™ 594 anti-mouse CD45 Antibody (103146, Biolegend), https://www.biolegend.com/fr-fr/products/pe-dazzle-594-anti-mouse-cd45-antibody-10070?GroupID=BLG1932@PE anti-human CD235a (Glycophorin A) Antibody (349106, Biolegend), https://www.biolegend.com/en-gb/products/pe-anti-human-cd235a-glycophorin-a-antibody-6769; FITC anti-human CD33 Antibody (303304, BioLegend), https://www.biolegend.com/en-us/products/fitc-anti-human-cd33-antibody-726; APC anti-human CD19 Antibody (302212, BioLegend), https://www.biolegend.com/ja-jp/products/apc-anti-human-cd19-antibody-715; Fixable Viability Dye eFluor 780 for live/dead staining (65-0865-14, Thermo Fisher), https://www.thermofisher.cn/order/catalog/product/65-0865-14.&lt;/a&gt;&lt;/td&gt; &lt;/tr&gt; &lt;/table&gt; &lt;/div&gt; &lt;div data-bbox=">March 2021</a> |

## Animals and other organisms

Policy information about [studies involving animals](#); [ARRIVE guidelines](#) recommended for reporting animal research

|                         |                                                                                                                                                      |
|-------------------------|------------------------------------------------------------------------------------------------------------------------------------------------------|
| Laboratory animals      | Female 4-6 weeks NOD.Cg-KitW-41J /ShiLtJGpt-Prkdcem26 Il2rgem26 / Gpt (NCG-X) mice were ordered from GemPharmatech (Nanjing, China) (Stock T003802). |
| Wild animals            | The study did not involve in wild animals.                                                                                                           |
| Field-collected samples | The study did not involve samples collected from the field.                                                                                          |
| Ethics oversight        | All animal experiments were approved by University Committee on Animal Research Protection of East China Normal University.                          |

Note that full information on the approval of the study protocol must also be provided in the manuscript.

## Human research participants

Policy information about [studies involving human research participants](#)

|                            |                                                                                                                                                                                                                                                                                                                                                                                                                                                                                                                                                                                                                                                                                                                                                                                                                         |
|----------------------------|-------------------------------------------------------------------------------------------------------------------------------------------------------------------------------------------------------------------------------------------------------------------------------------------------------------------------------------------------------------------------------------------------------------------------------------------------------------------------------------------------------------------------------------------------------------------------------------------------------------------------------------------------------------------------------------------------------------------------------------------------------------------------------------------------------------------------|
| Population characteristics | Genotype and age-sex information of the cell donors involved in this study are listed below: $\beta$ -thalassaemia patient ( $\beta\beta$ + #1), 7 yrs old, male, [genotype $\beta$ CD41/42(-CTTT)/ $\beta$ -28]; HbE #1 patient, 7 yrs old, male, [genotype $\beta$ CD17/ $\beta$ E]; HbE #2 patient, 8 yrs old, male, [genotype $\beta$ CD17/ $\beta$ E]; HbE #3 patient, 7 yrs old, female, [genotype $\beta$ CD17/ $\beta$ E]; IVS II-654 #1 patient, 8 yrs old, female, [genotype $\beta$ CD41/42(-CTTT)/ $\beta$ IVS II-654]; IVS II-654 #2 patient, 7 yrs old, female, [genotype $\beta$ CD41/42(-CTTT)/ $\beta$ IVS II-654]; IVS II-654 #3 patient, 8 yrs old, female, [genotype $\beta$ -28/ $\beta$ IVS II-654]; IVS II-654 #4 patient, 9 yrs old, female, [genotype $\beta$ IVS II-654/ $\beta$ IVS II-654]. |
| Recruitment                | Healthy human participants were recruited anonymously. Thalassaemia patients were recruited based on a doctor's diagnosis of $\beta$ -thalassemia with genotype confirmation. No potential self-selection bias and other biases are present.                                                                                                                                                                                                                                                                                                                                                                                                                                                                                                                                                                            |
| Ethics oversight           | Peripheral blood mobilized human CD34+ HSPCs from anonymous healthy donors were obtained from the First Affiliated Hospital of Zhejiang University School of Medicine (FAHZU), approved by the Medical Ethics Committee (MEC) of FAHZU, and informed consent was obtained from the donors. $\beta$ -thalassaemia patient CD34+ HSPCs were isolated from plerixafor-mobilized or unmobilized peripheral blood following Xiangya Hospital Central South University Medical Ethics Committee (MEC), the First Affiliated Hospital of Guangxi Medical University MEC and PLA 923 Hospital MEC approval and informed patient consent.                                                                                                                                                                                        |

Note that full information on the approval of the study protocol must also be provided in the manuscript.

## Flow Cytometry

### Plots

Confirm that:

- The axis labels state the marker and fluorochrome used (e.g. CD4-FITC).
- The axis scales are clearly visible. Include numbers along axes only for bottom left plot of group (a 'group' is an analysis of identical markers).
- All plots are contour plots with outliers or pseudocolor plots.
- A numerical value for number of cells or percentage (with statistics) is provided.

### Methodology

|                           |                                                                                                                                                                                                                                                                                                                                |
|---------------------------|--------------------------------------------------------------------------------------------------------------------------------------------------------------------------------------------------------------------------------------------------------------------------------------------------------------------------------|
| Sample preparation        | Mouse bone marrow were harvested for flow cytometry analysis as described in the manuscript.                                                                                                                                                                                                                                   |
| Instrument                | FACSAria II machine (BD Biosciences)                                                                                                                                                                                                                                                                                           |
| Software                  | Flowjo v10                                                                                                                                                                                                                                                                                                                     |
| Cell population abundance | hCD45+ for Human chimerism, hCD19 for human B cells, human CD33 for human granulocytes and human monocytes, hCD235a for human erythroid cells                                                                                                                                                                                  |
| Gating strategy           | Human cells gated from hCD45+ population, mouse cells gated from mCD45+ population. B cells gated from hCD45+CD19+ population. Granulocytes gated from hCD45+CD19-CD33dim with SSC high population. Monocytes gated from hCD45+CD19-CD33+ with SSC low population. Erythroid cells gated from hCD45-mCD45-hCD235a+ population. |

Tick this box to confirm that a figure exemplifying the gating strategy is provided in the Supplementary Information.
